# Supplementary material for: A review on terpenes for treatment of gastric cancer: current status and nanotechnology-enabled future
Source: Royal Society of Chemistry journal article supplement (doi:10.1039/d2su00137c), 2023-01-01
Supplement: d2su00137c1.pdf [file d2su00137c1.pdf]

Supplementary Table 1: FDA approved drugs with their side effects and mode of action.

| Name        | Structure                                                                         | Gastric cancer          | Mechanism                                                                                                                                                                                                                                                  | Side effects                                                                                                                                                   |
|-------------|-----------------------------------------------------------------------------------|-------------------------|------------------------------------------------------------------------------------------------------------------------------------------------------------------------------------------------------------------------------------------------------------|----------------------------------------------------------------------------------------------------------------------------------------------------------------|
| Everolimus  | 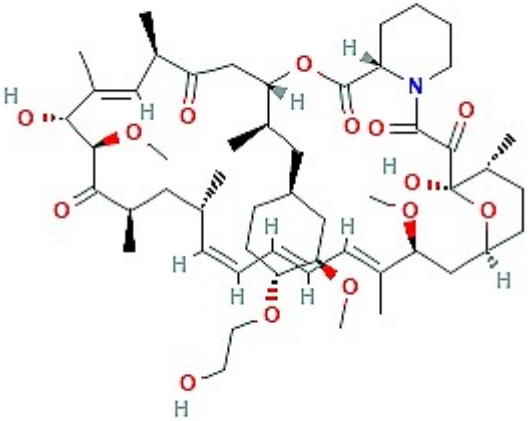 | Gastric cancer          | <ul style="list-style-type: none"><li>• Decreases proliferation and attenuated production of HIF-1<math>\alpha</math> and VEGF in gastric cancer cells in vitro.</li><li>• In vivo, everolimus significantly inhibited tumor growth <sup>1</sup></li></ul> | <ul style="list-style-type: none"><li>• Swelling of eye</li><li>• Swelling of palm</li><li>• Muscle twitching</li><li>• Prolonged bleeding from cuts</li></ul> |
| Ramucirumab |                                                                                   | Gastroesophageal cancer | <ul style="list-style-type: none"><li>• It targets VEGFR-2 receptor <sup>2</sup></li></ul>                                                                                                                                                                 | <ul style="list-style-type: none"><li>• Neutropenia</li><li>• Intestinal obstruction</li><li>• Arterial blood clots</li></ul>                                  |

|             |                                                                                    |                                  |                                                                                                                                                                                                                                                                              |                                                                                                                                          |
|-------------|------------------------------------------------------------------------------------|----------------------------------|------------------------------------------------------------------------------------------------------------------------------------------------------------------------------------------------------------------------------------------------------------------------------|------------------------------------------------------------------------------------------------------------------------------------------|
|             |                                                                                    |                                  |                                                                                                                                                                                                                                                                              | <ul style="list-style-type: none"> <li>• Hyponatremia</li> </ul>                                                                         |
| Trastuzumab | 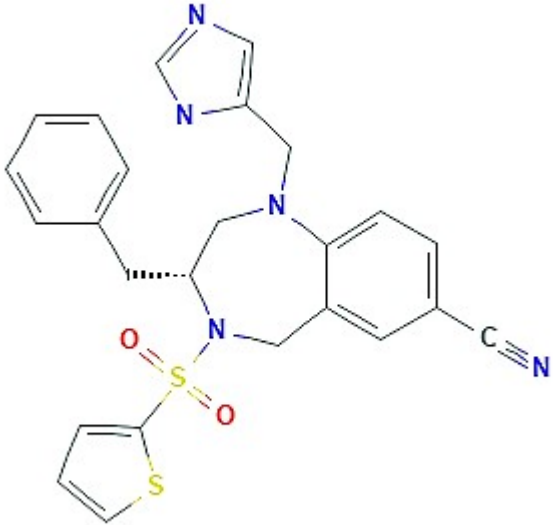 | Gastroesophageal junction cancer | <ul style="list-style-type: none"> <li>• demonstrated HER2-expression-dependent cell growth inhibition</li> <li>• exhibit potent antitumor activity in a broad selection of HER2-expressing xenograft cells, including those with low HER2 expression<sup>3</sup></li> </ul> | <ul style="list-style-type: none"> <li>• Heart problems</li> <li>• Lung problems</li> <li>• Upper respiratory tract infection</li> </ul> |

|                      |                                                                                                                                                                                                                                                                                                                                                                                                                                                                                                               |                                            |                                                                                                                                                                  |                                                                                                                                                       |
|----------------------|---------------------------------------------------------------------------------------------------------------------------------------------------------------------------------------------------------------------------------------------------------------------------------------------------------------------------------------------------------------------------------------------------------------------------------------------------------------------------------------------------------------|--------------------------------------------|------------------------------------------------------------------------------------------------------------------------------------------------------------------|-------------------------------------------------------------------------------------------------------------------------------------------------------|
| <p>Imatinib</p>      | 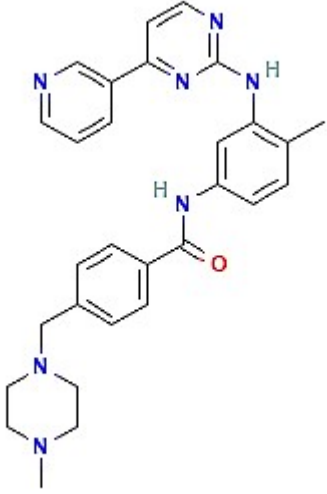 <p>The image shows the chemical structure of Imatinib. It consists of a central pyrimidopyrimidine ring system. One nitrogen atom in the six-membered ring is substituted with a 4-pyridyl group. The other nitrogen atom in the six-membered ring is substituted with a 3-methylphenyl group. The nitrogen atom in the five-membered ring is substituted with a 4-(4-(4-methylpiperidin-1-yl)benzyl)phenylamino group.</p> | <p>Gastrointestinal stroma tumor</p>       | <ul style="list-style-type: none"> <li>• induces pro-apoptotic Bcl2 family proteins</li> <li>• targets BCR-ABL, c-KIT, and PDGFR kinases <sup>4</sup></li> </ul> | <ul style="list-style-type: none"> <li>• Irregular heartbeat</li> <li>• Seizures</li> <li>• Unusual bleeding or bruising</li> <li>• Ulcers</li> </ul> |
| <p>Pembrolizumab</p> |                                                                                                                                                                                                                                                                                                                                                                                                                                                                                                               | <p>Gastric and gastroesophageal cancer</p> | <ul style="list-style-type: none"> <li>• Binds to PD-1 and prevents its binding with PD-1 ligands <sup>5</sup></li> </ul>                                        | <ul style="list-style-type: none"> <li>• Anemia</li> <li>• Kidney failure</li> <li>• Lymphopenia</li> <li>• Vitiligo</li> </ul>                       |

|                     |                                                                                                                                                                                                                                                                                                                                                                                                                                                                                                            |                                                 |                                                                                                                                                        |                                                                                                                               |
|---------------------|------------------------------------------------------------------------------------------------------------------------------------------------------------------------------------------------------------------------------------------------------------------------------------------------------------------------------------------------------------------------------------------------------------------------------------------------------------------------------------------------------------|-------------------------------------------------|--------------------------------------------------------------------------------------------------------------------------------------------------------|-------------------------------------------------------------------------------------------------------------------------------|
| <p>Trifluridine</p> | 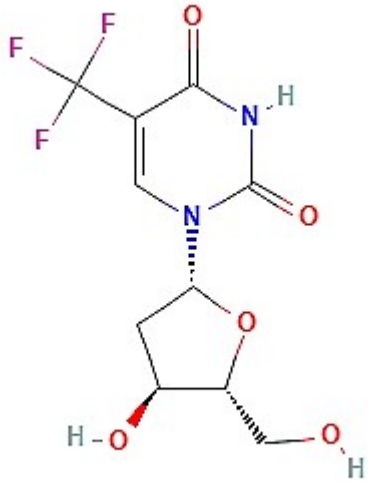 <p>The image shows the chemical structure of Trifluridine. It consists of a pyrimidine ring substituted with three fluorine atoms at the 5-position. The nitrogen at the 1-position is hydrogen-bonded to a carbonyl group at the 2-position. The nitrogen at the 3-position is linked via a dashed bond to the C5' position of a ribose sugar ring. The ribose ring has hydroxyl groups at the 2' and 3' positions.</p> | <p>Gastroesophageal junction adenocarcinoma</p> | <ul style="list-style-type: none"> <li>• Prolongs OS, PFS</li> <li>• Prolongs time for deterioration of ECOG performance status<sup>6</sup></li> </ul> | <ul style="list-style-type: none"> <li>• Blurred vision</li> <li>• Puffy eyelids</li> <li>• Severe burning in eyes</li> </ul> |
| <p>Docetaxel</p>    |  <p>The image shows the chemical structure of Docetaxel, a complex taxane. It features a complex polycyclic core with multiple hydroxyl groups and a side chain containing a benzamide group and a tert-butyl ester group.</p>                                                                                                                                                                                           | <p>Gastroesophageal junction adenocarcinoma</p> | <ul style="list-style-type: none"> <li>• Inhibits microtubule disassembly</li> <li>• Cell cycle arrest at G2/M transition<sup>7</sup></li> </ul>       | <ul style="list-style-type: none"> <li>• Liver problems</li> <li>• Low blood cell count</li> <li>• Loss of vision</li> </ul>  |

|                 |                                                                                    |                                       |                                                                                                                                                    |                                                                                                                                                     |
|-----------------|------------------------------------------------------------------------------------|---------------------------------------|----------------------------------------------------------------------------------------------------------------------------------------------------|-----------------------------------------------------------------------------------------------------------------------------------------------------|
| 5- Fluorouracil | 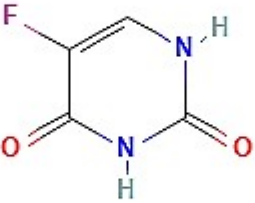  | Gastric cancer                        | <ul style="list-style-type: none"> <li>• Blocks thymidylate synthetase conversion of deoxyuridylic acid to thymidylic acid<sup>8</sup>.</li> </ul> | <ul style="list-style-type: none"> <li>• Leukopenia</li> <li>• Angina</li> <li>• Coronary arteriosclerosis</li> <li>• hyperbilirubinemia</li> </ul> |
| Mitomycin       |  | Gastric and pancreatic adenocarcinoma | <ul style="list-style-type: none"> <li>• Inhibit DNA synthesis<sup>9</sup></li> </ul>                                                              | <ul style="list-style-type: none"> <li>• Difficulty in breathing</li> <li>• Ulcers in mouth</li> <li>• Bloody diarrhea</li> </ul>                   |

## References

- (1) Cejka, D.; Preusser, M.; Woehrer, A.; Sieghart, W.; Strommer, S.; Werzowa, J.; Fuereder, T.; Wacheck, V. Everolimus (RAD001) and Anti-Angiogenic Cyclophosphamide Show Long-Term Control of Gastric Cancer Growth in Vivo. *Cancer Biol. Ther.* **2008**, *7* (9), 1377–1385. <https://doi.org/10.4161/cbt.7.9.6416>.

- (2) Smyth, E. C.; Tarazona, N.; Chau, I. Ramucirumab: Targeting Angiogenesis in the Treatment of Gastric Cancer. *Immunotherapy* **2014**, *6* (11), 1177–1186. <https://doi.org/10.2217/IMT.14.85>.
- (3) Koganemaru, S.; Shitara, K. Expert Opinion on Biological Therapy ISSN: (Print) ( Antibody-Drug Conjugates to Treat Gastric Cancer Antibody-Drug Conjugates to Treat Gastric Cancer. **2020**. <https://doi.org/10.1080/14712598.2020.1802423>.
- (4) Kim, J. L.; Lee, D.-H.; Jeong, S.; Kim, B. R.; Na, Y. J.; Park, S. H.; Jo, M. J.; Jeong, Y. A.; Oh, S. C. Imatinib-Induced Apoptosis of Gastric Cancer Cells Is Mediated by Endoplasmic Reticulum Stress. *Oncol. Rep.* **2019**, *41* (3), 1616. <https://doi.org/10.3892/OR.2018.6945>.
- (5) Mehta, R.; Shah, A.; Almhanna, K. Pembrolizumab for the Treatment of Patients with Recurrent Locally Advanced or Metastatic Gastric or Gastroesophageal Junction Cancer: An Evidence-Based Review of Place in Therapy. *Onco. Targets. Ther.* **2018**, *11*, 6525–6537. <https://doi.org/10.2147/OTT.S152513>.
- (6) Kang, C.; Dhillon, S.; Deeks, E. D. Trifluridine/Tipiracil: A Review in Metastatic Gastric Cancer. *Drugs 2019 7914* **2019**, *79* (14), 1583–1590. <https://doi.org/10.1007/S40265-019-01195-W>.
- (7) Jimenez, P.; Pathak, A.; Phan, A. T. The Role of Taxanes in the Management of Gastroesophageal Cancer. *J. Gastrointest. Oncol.* **2011**, *2* (4), 240–249. <https://doi.org/10.3978/j.issn.2078-6891.2011.027>.
- (8) Fukuda, H.; Takiguchi, N.; Koda, K.; Oda, K.; Seike, K.; Miyazaki, M. Thymidylate Synthase and Dihydropyrimidine Dehydrogenase Are Related to Histological Effects of 5-Fluorouracil and Cisplatin Neoadjuvant Chemotherapy for Primary Gastric Cancer Patients. *Cancer Invest.* **2006**, *24* (3), 235–241.
- (9) Crooke, S. T.; Bradner, W. T. Mitomycin C: A Review. *Cancer Treat. Rev.* **1976**, *3* (3), 121–139. [https://doi.org/10.1016/S0305-7372\(76\)80019-9](https://doi.org/10.1016/S0305-7372(76)80019-9).
